# Supplementary material for: Functional Characterization of Aldehyde Dehydrogenase in Fusarium graminearum
Source: MDPI journal article supplement (doi:10.3390/microorganisms11122875), 2023-11-28
Supplement: s1 [file s1]

**Table S1.** The primer sequences used in this study.

| Primer Name | Sequence (5'—3')         | Amplification Length | Annealing Temperature |
|-------------|--------------------------|----------------------|-----------------------|
| QTublinF    | GTCAGTGC GGTAACCAAATCGGT | 95 bp                | 60 °C                 |
| QTublinR    | CTCAGAGGTGCCGTTGTAAACACC |                      |                       |
| Q00217F     | GACCGCACCTTTCCCTGTT      | 264 bp               | 60 °C                 |
| Q00217R     | AGCCTCGGACCTATCCTGTG     |                      |                       |
| Q03873F     | ATGAGCAGGTGGTTAGAAGTGG   | 83 bp                | 60 °C                 |
| Q03873R     | TGGCTGTAAAGTCAATCGTGATG  |                      |                       |
| Q03649F     | CCAAAGGCTATTCGGTTATGC    | 294 bp               | 60 °C                 |
| Q03649R     | TGAGAACTGCTTGTTCGATGTATG |                      |                       |
| Q02322F     | GTCGGTGGCGGTCTTATCA      | 155 bp               | 60 °C                 |
| Q02322R     | CCCGTAGGCACATCACTTTG     |                      |                       |
| Q09595F     | CGTGCTCAGCCTTGTGGTT      | 237 bp               | 60 °C                 |
| Q09595R     | TTGGGAAGTGTTGCCTGAATAG   |                      |                       |
| Q02263F     | TACTTCTGCCTGGGGCTACG     | 114 bp               | 60 °C                 |
| Q02263R     | GTGACAACGCCTCCCTCTTT     |                      |                       |
| Q03703F     | TTTACCAGATTTACCCCTTCGTCC | 216 bp               | 60 °C                 |
| Q03703R     | GTTCAACATCAGCCATAGTTCCAT |                      |                       |
| K04194 1F   | CCCAGAAGCCACAACATC       | 619 bp               | 49 °C                 |
| K04194 2R   | CTTGCCTCACCAACCCT        |                      |                       |
| K04194 3F   | TGGCGATGATAGCAAGA        | 314 bp               | 45 °C                 |
| K04194 4R   | AACAATGAGGAAGGACGA       |                      |                       |
| K04194 5F   | ATGTCAGACTTGTACGTTAACC   | 1610 bp              | 57 °C                 |
| K04194 6R   | TCACAGACGAGAACCCAAGTT    |                      |                       |
| K04194 7F   | GGCTTGCCTTGCTCCAC        | 768 bp               | 51 °C                 |
| H855 R      | GCTGATCTGACCAGTTGC       |                      |                       |
| H856 F      | GTCGATGCGACGCAATCGT      | 562 bp               | 51 °C                 |
| K04194 8R   | ATAGTCGGGTGGTGGGAAG      |                      |                       |
| K00139 1F   | GCCAAGATTTGAGGGATAA      | 238 bp               | 49 °C                 |
| K00139 2R   | TGACGGACAAGATAGGGA       |                      |                       |
| K00139 3F   | TTTGATGGTGGTGATGGG       | 352 bp               | 49 °C                 |
| K00139 4R   | TCTGTTACCGAGATTGCTG      |                      |                       |
| K00139 5F   | ATGTCTCCCCCCTCAATC       | 1560 bp              | 51 °C                 |
| K00139 6R   | CTACAGCCTATTTCCCATAT     |                      |                       |
| K00139 7F   | CCAGCGAGACAGGATTAGA      | 424 bp               | 51 °C                 |
| H855 R      | GCTGATCTGACCAGTTGC       |                      |                       |
| H856 F      | GTCGATGCGACGCAATCGT      | 977 bp               | 55 °C                 |
| K00139 8R   | GCAACCCTCCCATCCTCAA      |                      |                       |
| K11482 1F   | CCACTACCACCACCAACA       | 413 bp               | 49 °C                 |
| K11482 2R   | CTCGGAGCCAAGATTATT       |                      |                       |
| K11482 3F   | GATGAATCTAAGGTCCAGTCC    | 600 bp               | 53 °C                 |
| K11482 4R   | CCGTCTTTGTGCCGATC        |                      |                       |
| K11482 5F   | ATGGCGCATACGGATGTG       | 1462 bp              | 51 °C                 |

|           |                        |         |       |
|-----------|------------------------|---------|-------|
| K11482 6R | CTACCCATACAGCTGGGA     |         |       |
| K11482 7F | CCCACTACCACCACCAA      |         |       |
| H855 R    | GCTGATCTGACCAGTTGC     | 947 bp  | 51 °C |
| H856 F    | GTCGATGCGACGCAATCGT    |         |       |
| K11482 8R | TCTCAACATGCGGAAGC      | 1885 bp | 55 °C |
| K05375 1F | CATCTTCACCAGGCATAA     |         |       |
| K05375 2R | CCGTCAAGACCCGTTA       | 1482 bp | 45 °C |
| K05375 3F | GATTTCGTGGTCGGTCTA     |         |       |
| K05375 4R | TTCCGTCAAACCTCTTCTCAT  | 145 bp  | 49 °C |
| K05375 5F | ATGACGTTCCCATCCGATAT   |         |       |
| K05375 6R | CTACAATTTGGAGAAAACACCC | 1530 bp | 55 °C |
| K05375 7F | AGCAGGCAGGCAAGGA       |         |       |
| H855 R    | GCTGATCTGACCAGTTGC     | 1767 bp | 47 °C |
| H856 F    | GTCGATGCGACGCAATCGT    |         |       |
| K05375 8R | TTGGGTCGCCTTTAT        | 681 bp  | 45 °C |
| K00979 1F | GGTGGGTTTGGCTGTGG      |         |       |
| K00979 2R | GTAAGTGTCTCGGCTTCTGG   | 454 bp  | 54 °C |
| K00979 3F | GTTTGCCAATCAATCCAC     |         |       |
| K00979 4R | TGTTTCGCCCTCGTTAG      | 990 bp  | 47 °C |
| K00979 5F | ATGGCTCTCACCGTCGAGCTGT |         |       |
| K00979 6R | TTAGTACAGCTTGATGGC     | 1594 bp | 52 °C |
| K00979 7F | TTAGCAAATAACACCGACTG   |         |       |
| H855 R    | GCTGATCTGACCAGTTGC     | 1137 bp | 51 °C |
| H856 F    | GTCGATGCGACGCAATCGT    |         |       |
| K00979 8R | GTATGTATTAGGTGAGGGAGG  | 1314 bp | 55 °C |
| K02160 1F | CGTTGGATGTTGGGACTG     |         |       |
| K02160 2R | GGGAACCTGGAGGAAAGC     | 467 bp  | 51 °C |
| K02160 3F | ATTGGGAATGACTTGGCTAT   |         |       |
| K02160 4R | CGTTATCTGGAGATGTGGG    | 311 bp  | 51 °C |
| K02160 5F | ATGACATCAACTACACAAATC  |         |       |
| K02160 6R | CTATAATTCAAATCCCAAGTT  | 1701 bp | 50 °C |
| K02160 7F | TGCGAAACTCCTCCACCA     |         |       |
| H855 R    | GCTGATCTGACCAGTTGC     | 921 bp  | 51 °C |
| H856 F    | GTCGATGCGACGCAATCGT    |         |       |
| K02160 8R | AACAGTGAGGTCGTAGTAGCC  | 1043 bp | 55 °C |
| K05831 1F | TGAGACTGATAGAGGAGGACC  |         |       |
| K05831 2R | CTTGGCACGCATAACG       | 794 bp  | 50 °C |
| K05831 3F | AACAGCGAACTCGGTCA      |         |       |
| K05831 4R | TCAAAGCCCTTCATCCC      | 702 bp  | 47 °C |
| K05831 5F | ATGGCAGAAATTACCATCAC   |         |       |
| K05831 6R | TCACAAGTTGAAAACATTAAT  | 1591 bp | 49 °C |
| K05831 7F | AAAGCCACAGCCATCTC      |         |       |
| H855 R    | GCTGATCTGACCAGTTGC     | 1745 bp | 47 °C |
| H856 F    | GTCGATGCGACGCAATCGT    | 2081 bp | 52 °C |

|             |                              |         |       |
|-------------|------------------------------|---------|-------|
| K05831 8R   | TCTGCTGTCGGAAACCC            |         |       |
| HYG/F       | GGCTTGGCTGGAGCTAGTGGAGGTCAA  | 765 bp  | 45 °C |
| HY/R        | GTATTGACCGATTTCCTTGCGGTCCGAA |         |       |
| YG/F        | GATGTAGGAGGGCGTGGATATGTCCT   | 921 bp  | 53 °C |
| HYG/R       | AACCCGCGGTCGGCATCTACTCTATTC  |         |       |
| C04194 F    | CAGCCACCTTTCCCCACGTCT        | 2614 bp | 59 °C |
| C04194 R    | CAGACGAGAACCCAAGTTGAC        |         |       |
| GFP-Hind3-F | ATGGTGAGCAAGGGCGAG           | 758 bp  | 53 °C |
| GFP-BamHI-R | TTACTTGTACAGCTCGTCCA         |         |       |
